# Supplementary material
Source: publisher figshare collection journal article supplement (https://rs.figshare.com/ndownloader/files/15007994)
Supplement: Supplementary file 1 [file 15007994]

## Sheet: cactus6
Biological Process GO Term	Description	N	B	n	b	Enrichment	FDR q-value	P-value
GO:0006820	anion transport	13050	401	384	31	2.63	0.0136	9.14e-07
GO:0015711	organic anion transport	13050	310	384	25	2.74	0.0379	5.09e-06
GO:0006811	ion transport	13050	990	384	54	1.85	0.0343	6.93e-06
GO:0015849	organic acid transport	13050	203	384	17	2.85	0.392	0.000105
GO:0046942	carboxylic acid transport	13050	203	384	17	2.85	0.313	0.000105
GO:0015701	bicarbonate transport	13050	28	384	6	7.28	0.336	0.000136
GO:0010107	potassium ion import	13050	30	384	6	6.8	0.432	0.000204
GO:1990573	potassium ion import across plasma membrane	13050	30	384	6	6.8	0.378	0.000204
GO:0036109	alpha-linolenic acid metabolic process	13050	11	384	4	12.36	0.342	0.000207
GO:0044255	cellular lipid metabolic process	13050	753	384	40	1.81	0.309	0.000207
GO:0007601	visual perception	13050	179	384	15	2.85	0.357	0.000264
GO:0034220	ion transmembrane transport	13050	689	384	37	1.82	0.363	0.000293
GO:0033540	fatty acid beta-oxidation using acyl-CoA oxidase	13050	12	384	4	11.33	0.346	0.000303
GO:0050953	sensory perception of light stimulus	13050	183	384	15	2.79	0.356	0.000335
GO:0009165	nucleotide biosynthetic process	13050	227	384	17	2.55	0.396	0.0004
GO:0034033	purine nucleoside bisphosphate biosynthetic process	13050	47	384	7	5.06	0.383	0.000412
GO:0034030	ribonucleoside bisphosphate biosynthetic process	13050	47	384	7	5.06	0.36	0.000412
GO:0033866	nucleoside bisphosphate biosynthetic process	13050	47	384	7	5.06	0.34	0.000412
GO:1901293	nucleoside phosphate biosynthetic process	13050	229	384	17	2.52	0.346	0.000442
GO:0046949	fatty-acyl-CoA biosynthetic process	13050	24	384	5	7.08	0.428	0.000575
GO:0006629	lipid metabolic process	13050	934	384	45	1.64	0.502	0.000709
GO:0098656	anion transmembrane transport	13050	199	384	15	2.56	0.547	0.000809
GO:0019532	oxalate transport	13050	7	384	3	14.56	0.524	0.00081
GO:0042178	xenobiotic catabolic process	13050	7	384	3	14.56	0.502	0.00081
GO:0046476	glycosylceramide biosynthetic process	13050	7	384	3	14.56	0.482	0.00081
GO:0035556	intracellular signal transduction	13050	1272	384	57	1.52	0.469	0.00082
GO:0055085	transmembrane transport	13050	944	384	45	1.62	0.487	0.000884

## Sheet: cactus13
Biological Process GO Term	Description	N	B	n	b	Enrichment	FDR q-value	P-value
GO:0051179	localization	13050	3738	143	65	1.59	0.193	1.3e-05
GO:0046902	regulation of mitochondrial membrane permeability	13050	49	143	5	9.31	1	0.000191
GO:0006222	UMP biosynthetic process	13050	11	143	3	24.89	0.988	0.000199
GO:0046049	UMP metabolic process	13050	11	143	3	24.89	0.741	0.000199
GO:0009173	pyrimidine ribonucleoside monophosphate metabolic process	13050	11	143	3	24.89	0.593	0.000199
GO:0009174	pyrimidine ribonucleoside monophosphate biosynthetic process	13050	11	143	3	24.89	0.494	0.000199
GO:0070814	hydrogen sulfide biosynthetic process	13050	3	143	2	60.84	0.755	0.000355
GO:0009403	toxin biosynthetic process	13050	3	143	2	60.84	0.66	0.000355
GO:0090559	regulation of membrane permeability	13050	56	143	5	8.15	0.593	0.000359
GO:0006810	transport	13050	3245	143	54	1.52	0.599	0.000403
GO:0006811	ion transport	13050	990	143	23	2.12	0.623	0.000461
GO:0006820	anion transport	13050	401	143	13	2.96	0.572	0.000462
GO:0051234	establishment of localization	13050	3344	143	55	1.5	0.534	0.000467
GO:0055085	transmembrane transport	13050	944	143	22	2.13	0.632	0.000595
GO:0007006	mitochondrial membrane organization	13050	96	143	6	5.7	0.638	0.000643
GO:0019346	transsulfuration	13050	4	143	2	45.63	0.655	0.000705
GO:0009092	homoserine metabolic process	13050	4	143	2	45.63	0.617	0.000705
GO:0034067	protein localization to Golgi apparatus	13050	17	143	3	16.1	0.647	0.000783
GO:0055078	sodium ion homeostasis	13050	17	143	3	16.1	0.613	0.000783
GO:0009130	pyrimidine nucleoside monophosphate biosynthetic process	13050	17	143	3	16.1	0.582	0.000783
GO:0061024	membrane organization	13050	539	143	15	2.54	0.591	0.000835
GO:0098660	inorganic ion transmembrane transport	13050	487	143	14	2.62	0.618	0.000915
GO:0046132	pyrimidine ribonucleoside biosynthetic process	13050	18	143	3	15.21	0.602	0.000932
GO:0009129	pyrimidine nucleoside monophosphate metabolic process	13050	18	143	3	15.21	0.577	0.000932

## Sheet: cactus16 
Biological Process GO Term	Description	N	B	n	b	FDR q-value	P-value
N/A

## Sheet: cactus18
Biological Process GO Term	Description	N	B	n	b	FDR q-value	P-value
N/A

## Sheet: cactus24
	Biological Process GO Term	Description	N	B	n	b	Enrichment	FDR q-value	P-value
	GO:0002138	retinoic acid biosynthetic process	13050	6	52	2	83.65	1	0.000231
	GO:0016102	diterpenoid biosynthetic process	13050	7	52	2	71.7	1	0.000323
	GO:0016114	terpenoid biosynthetic process	13050	11	52	2	45.63	1	0.000837
	GO:0048703	embryonic viscerocranium morphogenesis	13050	11	52	2	45.63	1	0.000837

## Sheet: cactus25
Biological Process GO Term	Description	N	B	n	b	Enrichment	FDR q-value	P-value
GO:0009593	detection of chemical stimulus	13050	94	24	3	17.35	1	0.000656

## Sheet: All together
Biological Process GO Term	Description	N	B	n	b	Enrichment	FDR q-value	P-value
GO:0006820	anion transport	13050	401	734	52	2.31	0.000195	1.31e-08
GO:0006811	ion transport	13050	990	734	98	1.76	0.000127	1.7e-08
GO:0015711	organic anion transport	13050	310	734	42	2.41	0.000492	9.93e-08
GO:0055085	transmembrane transport	13050	944	734	87	1.64	0.00944	2.54e-06
GO:0015701	bicarbonate transport	13050	28	734	9	5.71	0.0418	1.41e-05
GO:0009404	toxin metabolic process	13050	17	734	7	7.32	0.0508	2.05e-05
GO:0034220	ion transmembrane transport	13050	689	734	65	1.68	0.0532	2.51e-05
GO:0070813	hydrogen sulfide metabolic process	13050	5	734	4	14.22	0.0882	4.74e-05
GO:0051179	localization	13050	3738	734	258	1.23	0.0787	4.76e-05
GO:0006810	transport	13050	3245	734	228	1.25	0.081	5.44e-05
GO:0051234	establishment of localization	13050	3344	734	233	1.24	0.103	7.58e-05
GO:0015849	organic acid transport	13050	203	734	25	2.19	0.229	0.000185
GO:0046942	carboxylic acid transport	13050	203	734	25	2.19	0.212	0.000185
GO:0019532	oxalate transport	13050	7	734	4	10.16	0.322	0.000303
GO:0042178	xenobiotic catabolic process	13050	7	734	4	10.16	0.3	0.000303
GO:0015698	inorganic anion transport	13050	131	734	18	2.44	0.356	0.000383
GO:0044281	small molecule metabolic process	13050	1380	734	106	1.37	0.408	0.000467
GO:0042221	response to chemical	13050	2038	734	147	1.28	0.493	0.000597
GO:0033559	unsaturated fatty acid metabolic process	13050	62	734	11	3.15	0.473	0.000604
GO:0048050	post-embryonic eye morphogenesis	13050	4	734	3	13.33	0.505	0.000679
GO:0015842	aminergic neurotransmitter loading into synaptic vesicle	13050	4	734	3	13.33	0.481	0.000679
GO:0010038	response to metal ion	13050	286	734	30	1.86	0.501	0.000741
GO:0098656	anion transmembrane transport	13050	199	734	23	2.05	0.526	0.000813
GO:0016310	phosphorylation	13050	929	734	75	1.44	0.537	0.000867
GO:0099587	inorganic ion import across plasma membrane	13050	55	734	10	3.23	0.517	0.00087
GO:0098659	inorganic cation import across plasma membrane	13050	55	734	10	3.23	0.497	0.00087
